# Supplementary material
Source: publisher site journal article supplement (https://www.dovepress.com/article/269783)
Supplement: Supplementary file 1 [file get_supplementary_file.php]

**Supplement Table 1.** The equation coefficients of these factors were calculated by regression analysis. The probability of PCa, HG-PCa and HCS-PCa that was calculated by combining the value of risk factors with each coefficient.

| P value | Calculated equations |
| --- | --- |
| Pca | e0.073*age+0.045*PSA-0.043*FPSA-0.012*PV+1.047*PI-RADS-8.972/(1+e0.073*age+0.045*PSA-0.043*FPSA-0.012*PV+1.047*PI-RADS-8.972) |
| HG-Pca | e0.064*age+0.036*PSA-2.951*F/TPSA-0.012*PV+1.21*PI-RADS-9.316/(1+e0.064*age+0.036*PSA-2.951*F/TPSA-0.012*PV+1.21*PI-RADS-9.316) |
| HCS-Pca | e0.056*age+0.037*PSA-3.497*F/TPSA-0.008*PV+1.16*PI-RADS-8.841/(1+e0.056*age+0.037*PSA-3.497*F/TPSA-0.008*PV+1.16*PI-RADS-8.841) |

**Abbreviation:** Pca, prostate cancer; HG-PCa, PCa with high Gleason score; HCS-PCa, PCa with high clinical stage.
